# Supplementary material for: Mitoxantrone dihydrochloride, an FDA approved drug, binds with SARS-CoV-2 NSP1 C-terminal
Source: Royal Society of Chemistry journal article supplement (doi:10.1039/d1ra07434b), 2022-01-01
Supplement: d1ra07434b1.pdf [file d1ra07434b1.pdf]

## Mitoxantrone dihydrochloride, an FDA approved drug, binds with SARS-CoV-2 NSP1 C-terminal

Prateek Kumar<sup>1#</sup>, Taniya Bhardwaj<sup>1#</sup>, and Rajanish Giri<sup>1\*</sup>

<sup>1</sup>Indian Institute of Technology Mandi, School of Basic Sciences, VPO Kamand, Himachal Pradesh 175005, India

\*Correspondence: Dr. Rajanish Giri, School of Basic Sciences, Indian Institute of Technology Mandi, Himachal Pradesh 175005, India. Email: [rajanishgiri@iitmandi.ac.in](mailto:rajanishgiri@iitmandi.ac.in). Telephone number: 01905-267134, Fax number: 01905-267138

### Supplementary Information

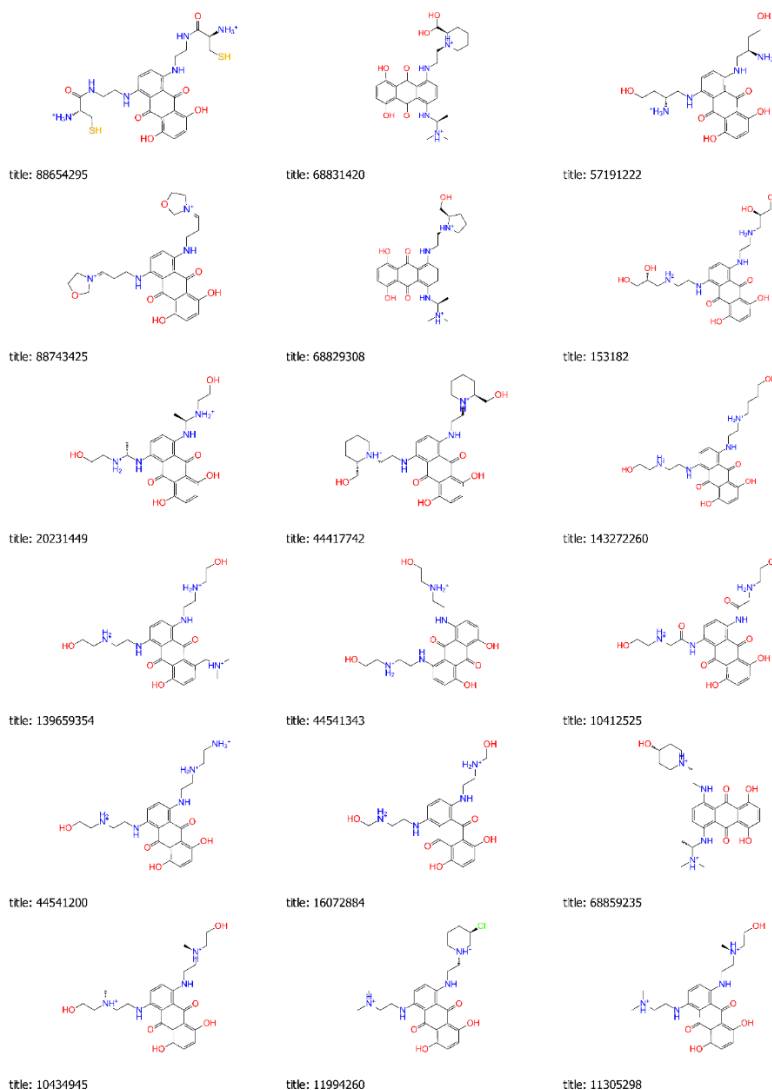

**Supplementary Figure 1A:** Two-dimensional structures of top identified compounds similar to Mitoxantrone from PubChem database with docking score more than -5.3 kcal/mol.

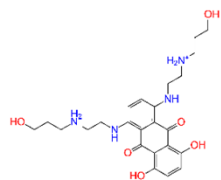

title: 153160

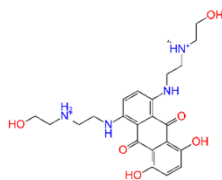

title: 59835315

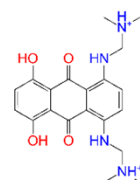

title: 59863202

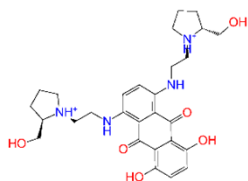

title: 25000768

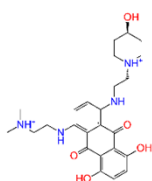

title: 11583587

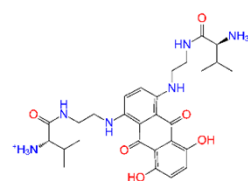

title: 70408715

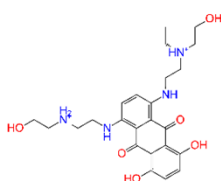

title: 68040943

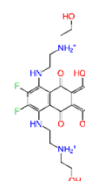

title: 59229103

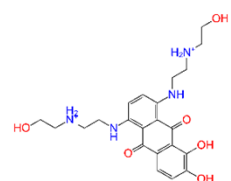

title: 13032841

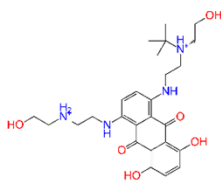

title: 59825360

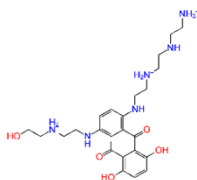

title: 44541201

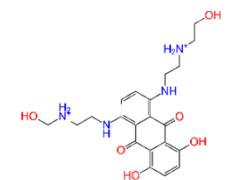

title: 44275839

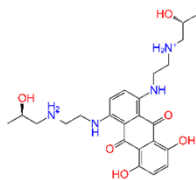

title: 433060

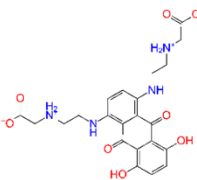

title: 126805

**Supplementary Figure 1B:** Two-dimensional structures of top identified compounds similar to Mitoxantrone from PubChem database with docking score more than -5.3 kcal/mol.

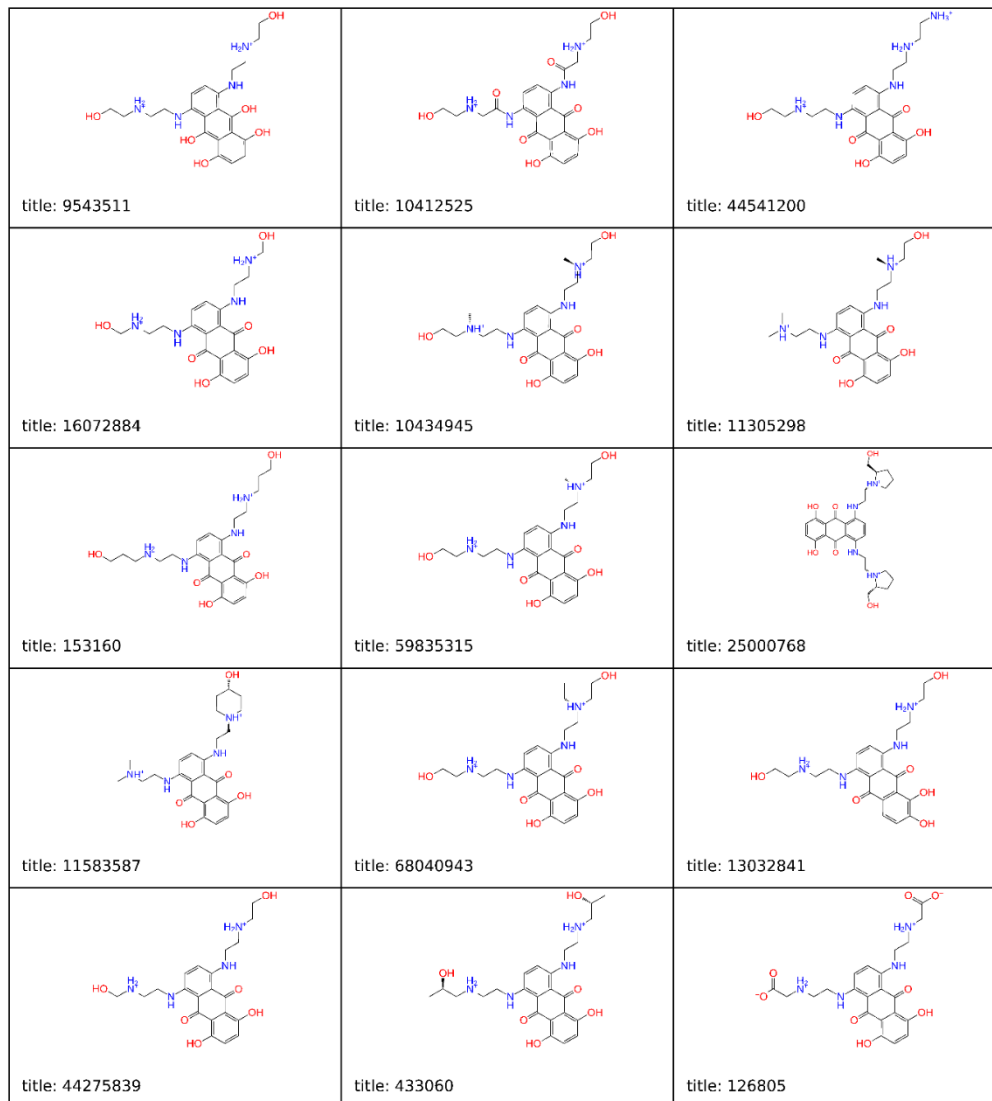

**Supplementary Figure 2:** Two-dimensional structures of top identified conformers similar to Mitoxantrone from PubChem database with docking score more than -5.3 kcal/mol.

### NSP1\_CTR-88654295

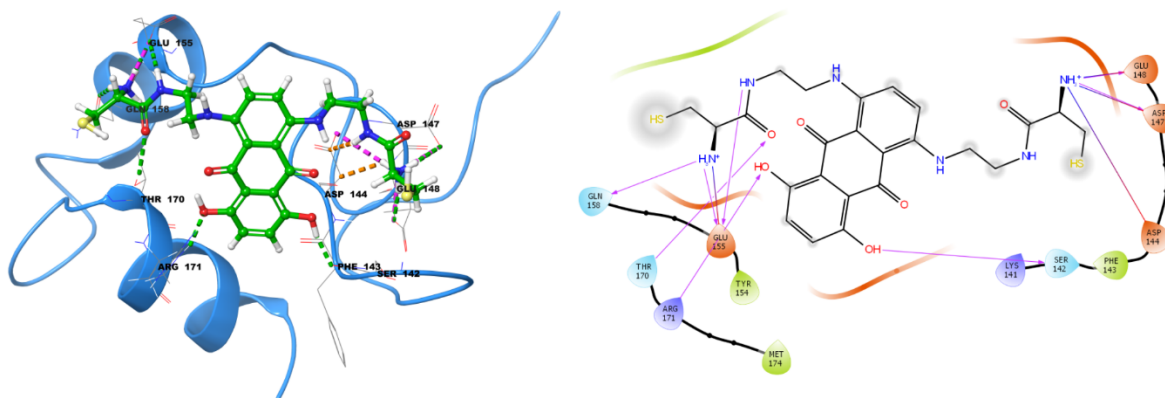

### NSP1\_CTR-68831420

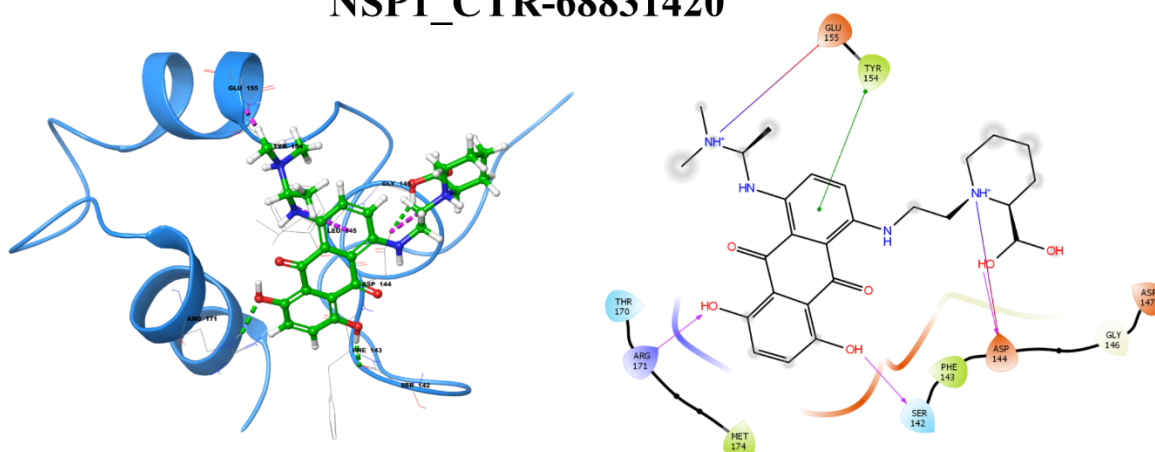

### NSP1\_CTR-57191222

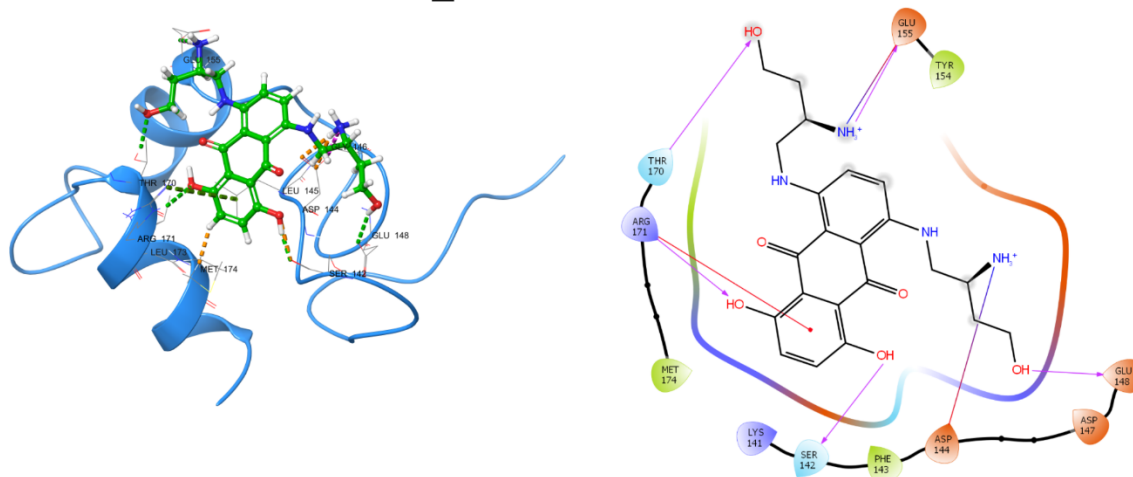

**Supplementary Figure 3A:** Three-dimensional binding poses and two-dimensional interaction diagrams of top identified compounds similar to Mitoxantrone from PubChem database with docking score more than -5.3 kcal/mol.

## NSP1\_CTR-88743425

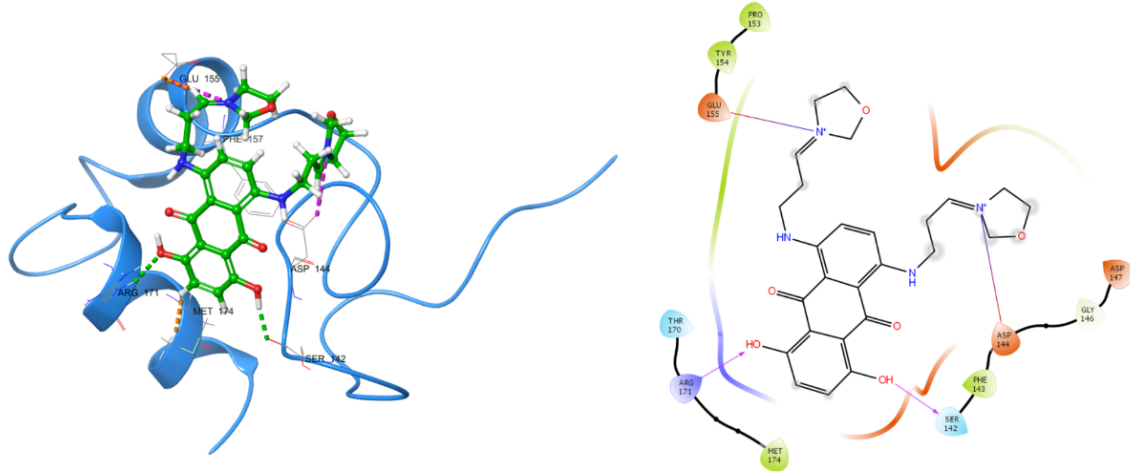

## NSP1\_CTR-68829308

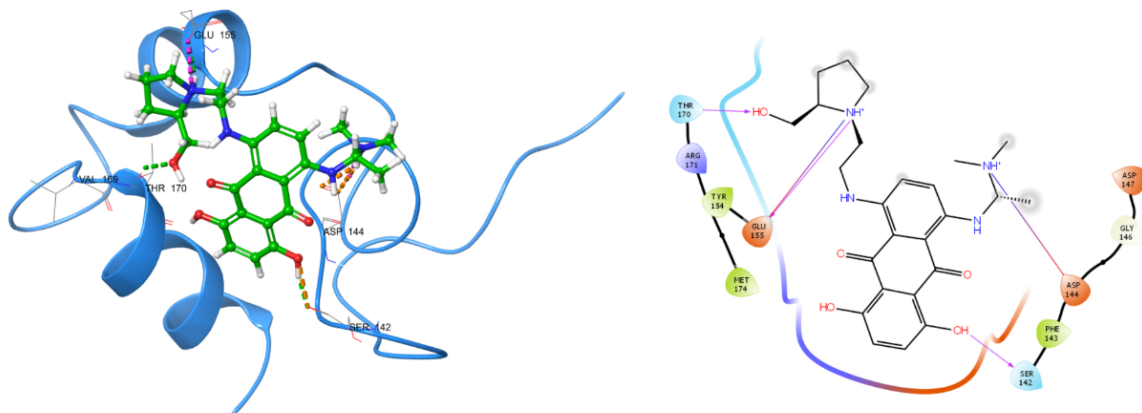

**Supplementary Figure 3B:** Three-dimensional binding poses and two-dimensional interaction diagrams of top identified compounds similar to Mitoxantrone from PubChem database with docking score more than -5.3 kcal/mol.

## NSP1\_CTR-9543511

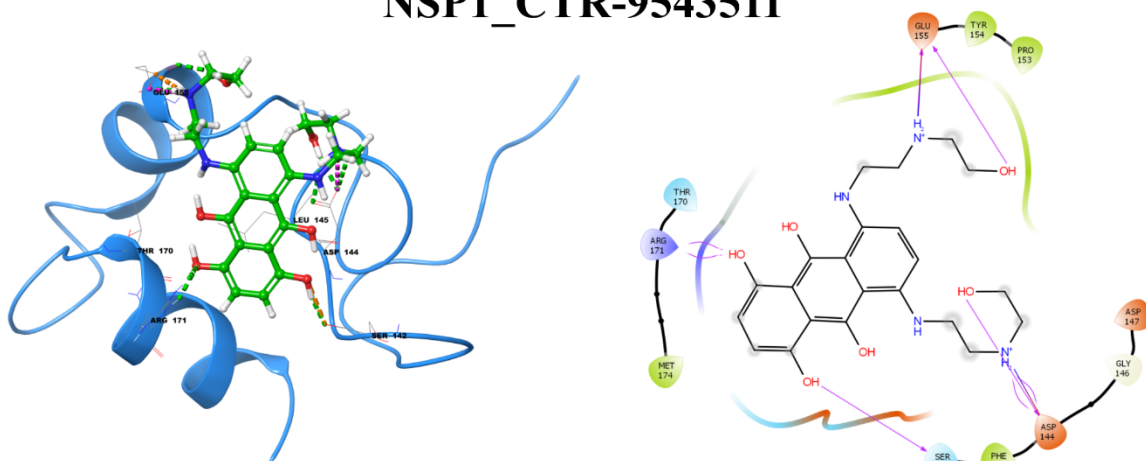

## NSP1\_CTR-10412525

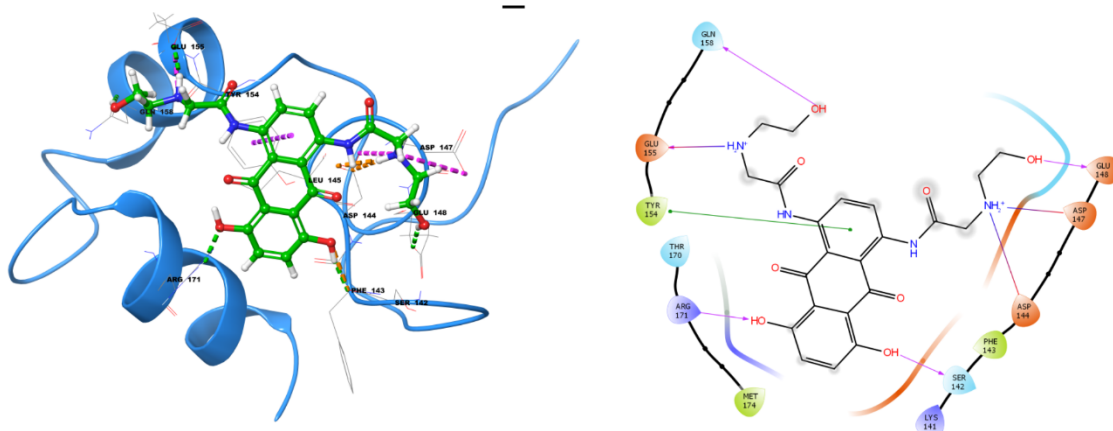

## NSP1\_CTR-44541200

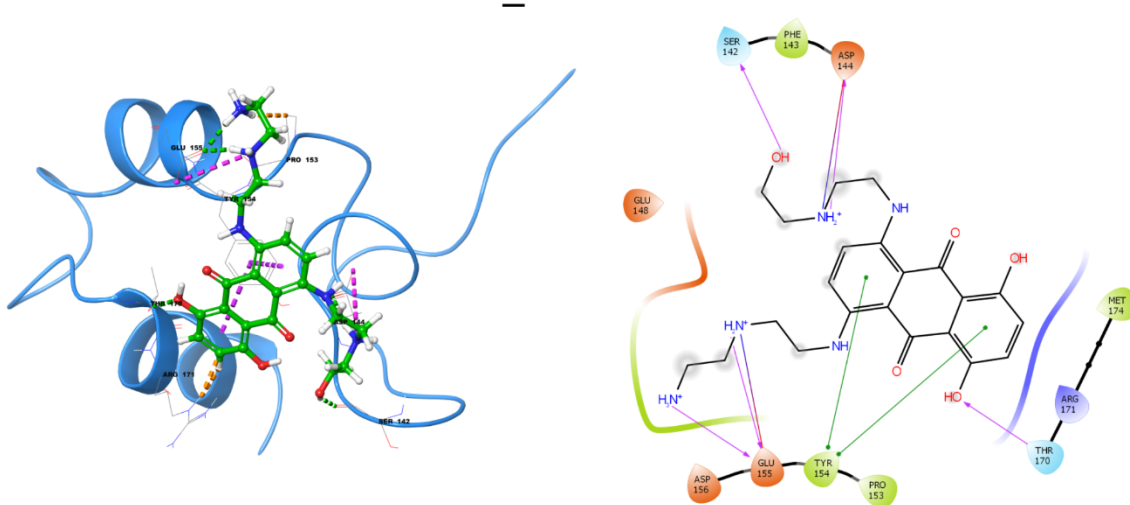

**Supplementary Figure 4A:** Three-dimensional binding poses and two-dimensional interaction diagrams of top identified conformers similar to Mitoxantrone from PubChem database with docking score more than -5.3 kcal/mol.

## NSP1\_CTR-16072884

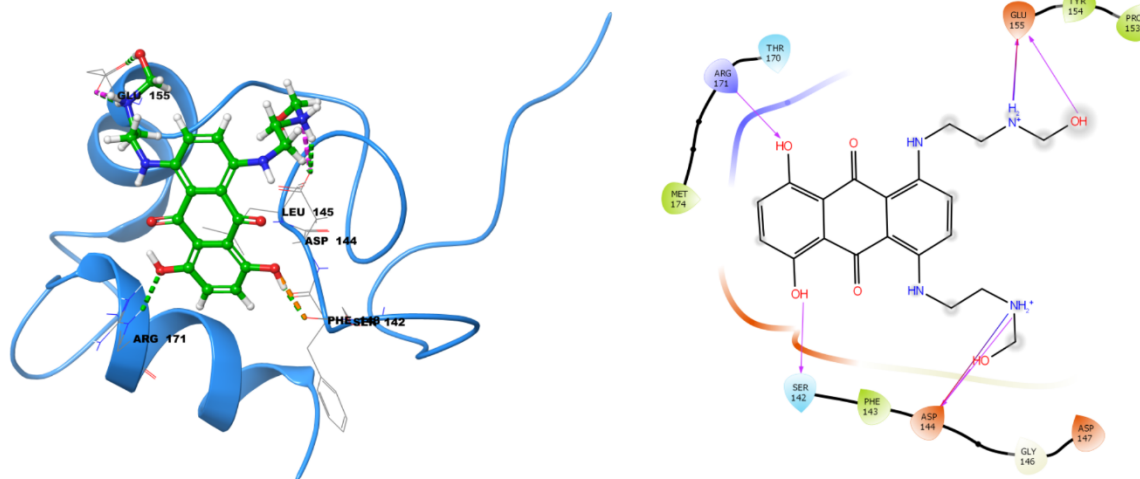

## NSP1\_CTR-10434945

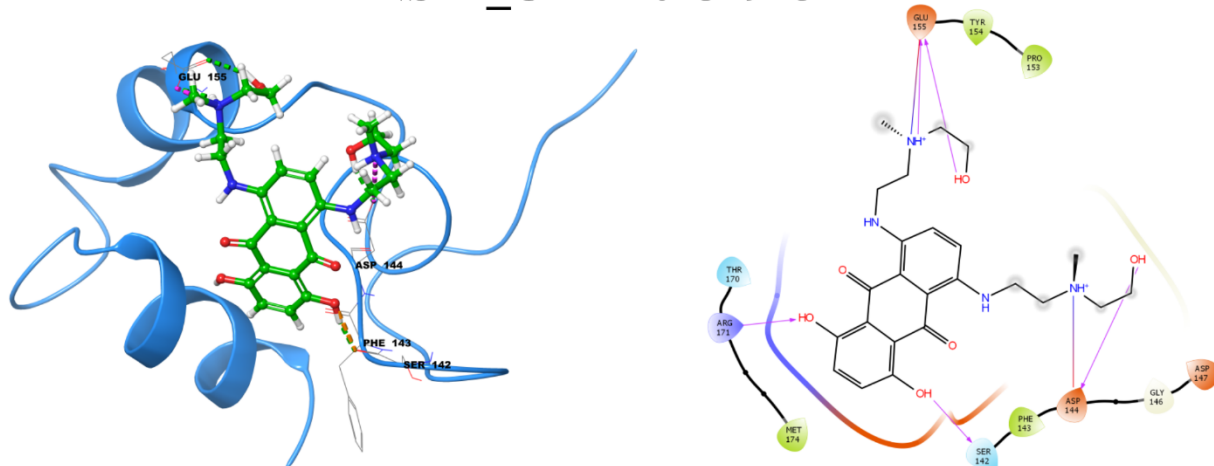

**Supplementary Figure 4B:** Three-dimensional binding poses and two-dimensional interaction diagrams of top identified conformers similar to Mitoxantrone from PubChem database with docking score more than -5.3 kcal/mol.

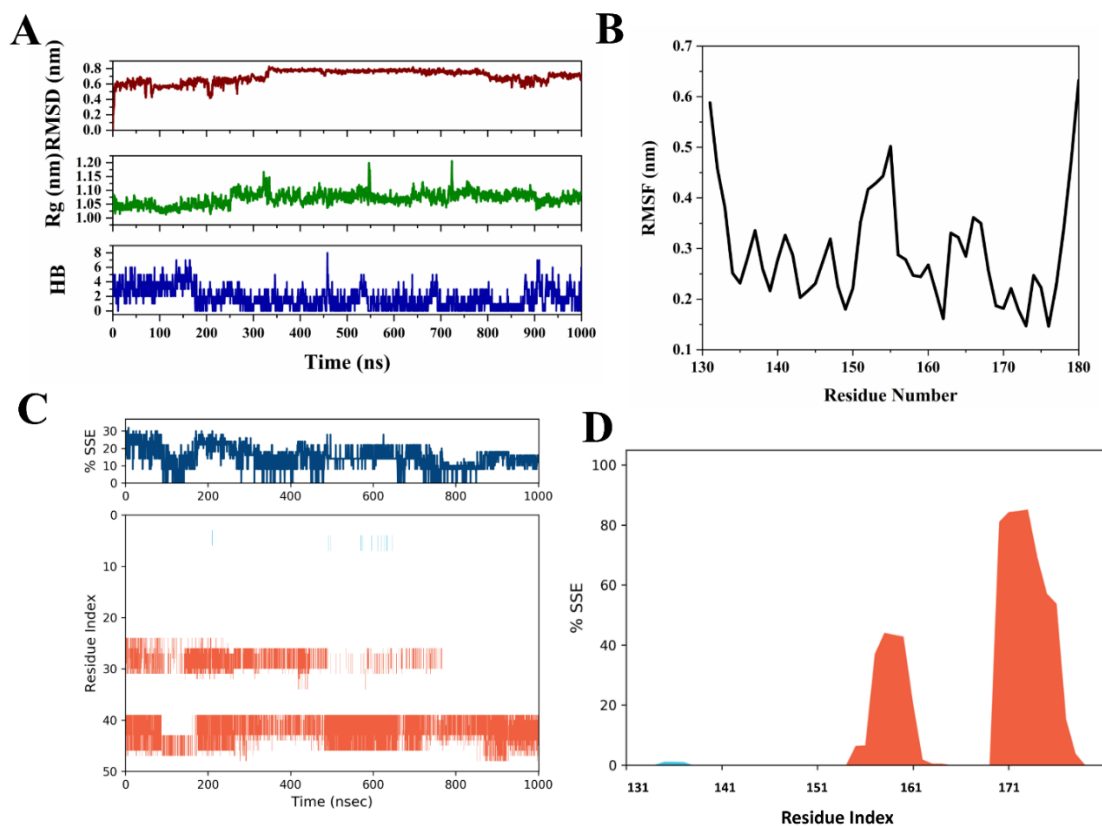

**Supplementary Figure 5:** Molecular dynamics simulation analysis of MTX bound NSP1-CTR using OPLS 2005 forcefield: (A) RMSD, Rg, of C-alpha ( $C\alpha$ ) atoms and hydrogen bonds (from up to down), (B) RMSF analysis of C-alpha atoms, (C) Timeline representation of each residue of forming helical and beta sheets in respective frame of one microsecond long simulation trajectory. (D) Total secondary structure element (%SSE) is shown for each residue during entire simulation period. The orange color shows helical region and cyan shows the beta sheets.





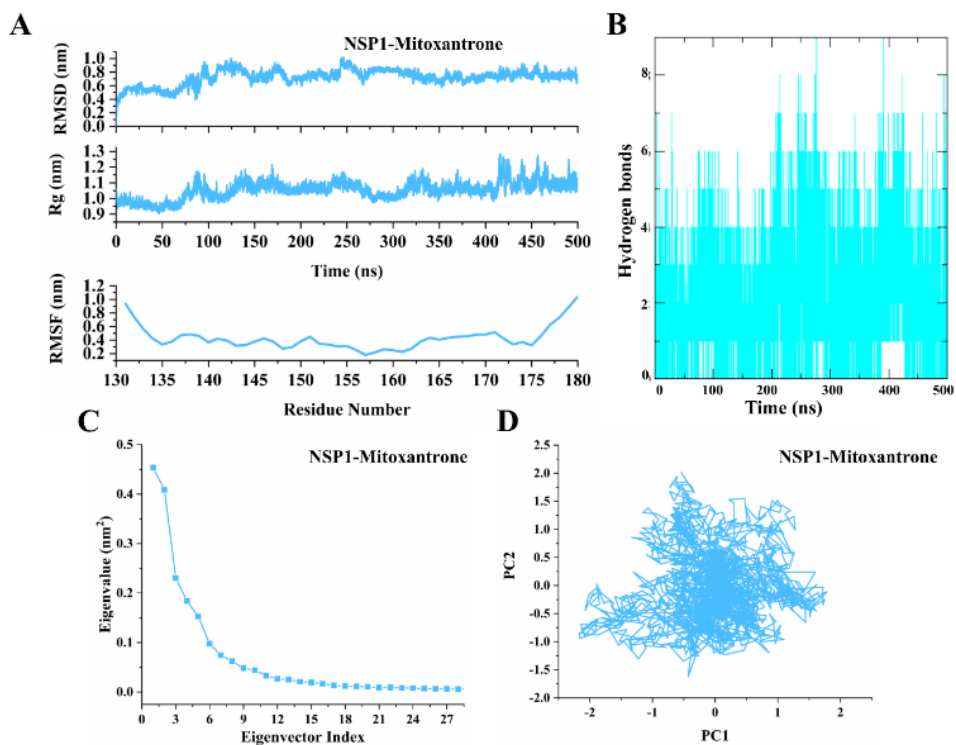

**Supplementary Figure 7:** Molecular dynamics simulation analysis of MTX bound NSP1-CTR using GROMOS 54A7 forcefield: (A) RMSD, Rg, and RMSF (from up to down), (B) hydrogen bonds analysis, (C) Eigenvector vs Eigenvalue plot, and (D) principal component analysis of last 20 ns simulation trajectory.

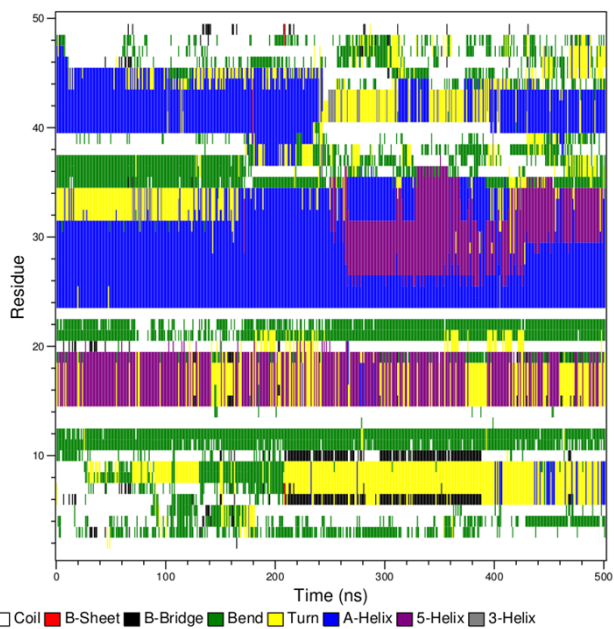

**Supplementary Figure 8:** Timeline representation of secondary structure change in NSP1-CTR during 500 ns long simulation trajectory. The colors are illustrated within the figure.

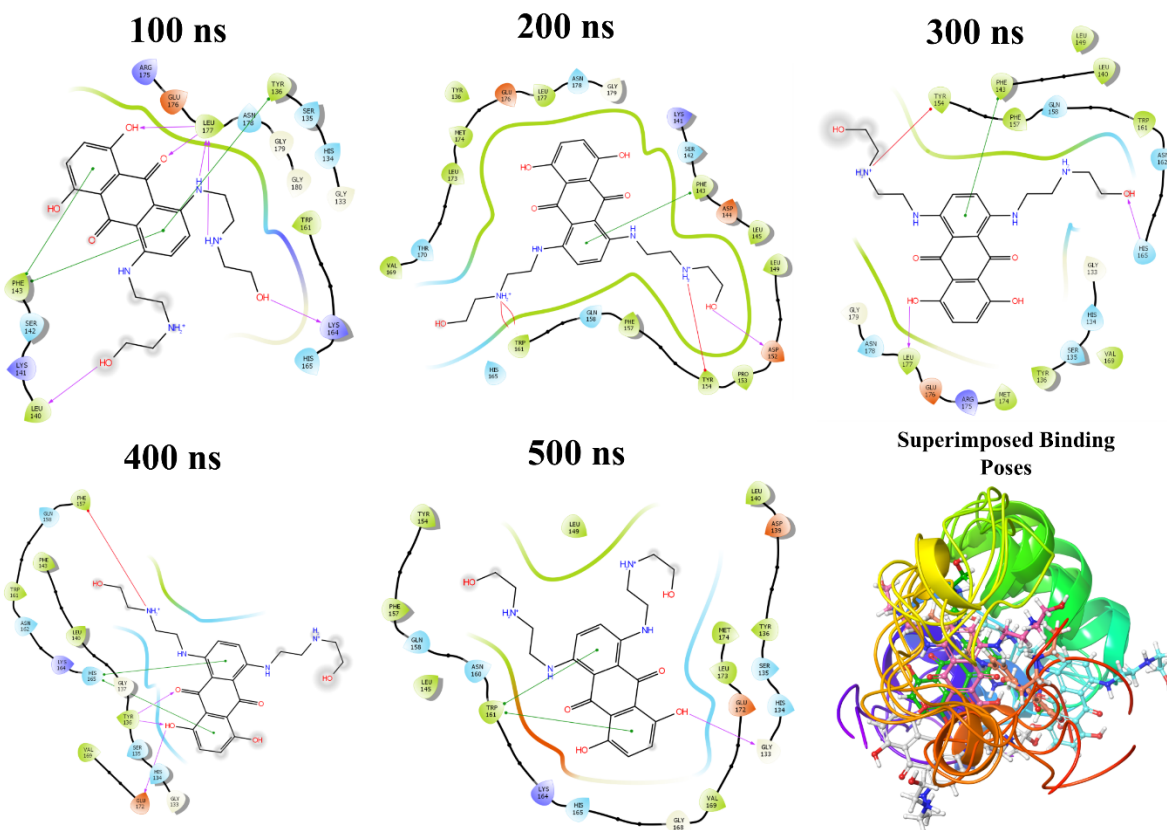

**Supplementary Figure 9: Snapshots of NSP1-CTR and MTX complex from Gromacs simulation trajectory: Two-dimensional interaction diagrams are shown for captured frames at a regular interval of 100 ns. The corresponding three-dimensional poses are superimposed.**

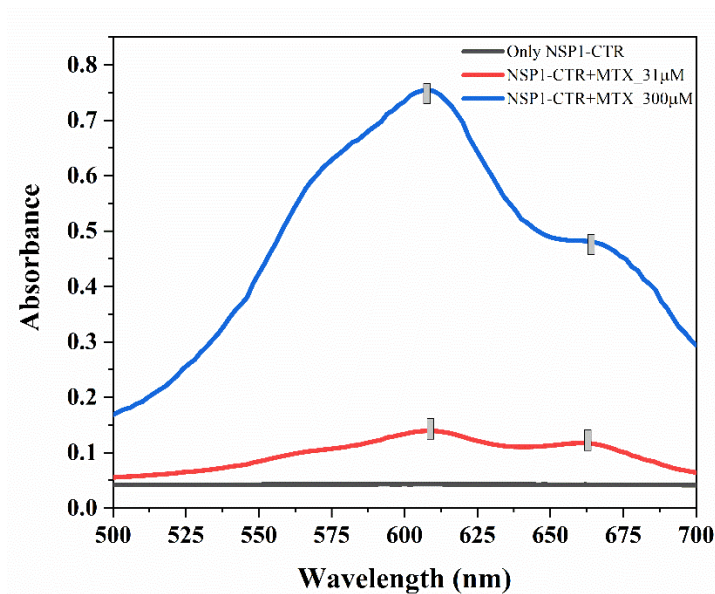

**Supplementary Figure 10: Absorption spectra of NSP1-CTR in absence and presence of MTX at two concentrations (31 μM and 300 μM) representing two major peaks around 660 nm and 610 nm corresponding to monomer and dimer forms, respectively.**

**Supplementary Table 1:** Detailed list of changes in  $\tau_1$ ,  $\tau_2$ , and  $\tau_3$  components of tryptophan lifetime of NSP1 due to increasing concentration of mitoxantrone.

| Mitoxantrone Concentration ( $\mu\text{M}$ )    | $\tau_1 \pm s$ (ns) | $\tau_2 \pm s$ (ns) | $\tau_3 \pm s$ (ns) |
|-------------------------------------------------|---------------------|---------------------|---------------------|
| <b>0</b><br>(Only NSP1-CTR; 7.5 $\mu\text{M}$ ) | 2.42 $\pm$ 0.10     | 0.61 $\pm$ 0.02     | 5.28 $\pm$ 0.04     |
| <b>25</b>                                       | 2.31 $\pm$ 0.06     | 5.12 $\pm$ 0.06     | 0.63 $\pm$ 0.02     |
| <b>50</b>                                       | 2.23 $\pm$ 0.08     | 5.02 $\pm$ 0.05     | 0.59 $\pm$ 0.02     |
| <b>100</b>                                      | 2.26 $\pm$ 0.08     | 4.96 $\pm$ 0.06     | 0.62 $\pm$ 0.02     |
| <b>200</b>                                      | 2.24 $\pm$ 0.08     | 4.91 $\pm$ 0.06     | 0.58 $\pm$ 0.01     |

**Supplementary Table 2:** Docking scores of top identified compounds similar to Mitoxantrone from PubChem database with docking score more than -5.3 kcal/mol.

| S. No. | PubChem ID | Docking score (kcal/mol) | MM-GBSA (kcal/mol) |
|--------|------------|--------------------------|--------------------|
| SC1    | 88654295   | -6.93                    | -49.28             |
| SC2    | 68831420   | -6.66                    | -43.76             |
| SC3    | 57191222   | -6.34                    | -53.37             |
| SC4    | 88743425   | -6.17                    | -42.06             |
| SC5    | 68829308   | -6.10                    | -48.03             |
| SC6    | 153182     | -6.08                    | -54.47             |
| SC7    | 20231449   | -6.06                    | -43.61             |
| SC8    | 44417742   | -6.03                    | -48.63             |
| SC9    | 143272260  | -6.01                    | -52.19             |
| SC10   | 139659354  | -5.98                    | -56.79             |
| SC11   | 44541343   | -5.86                    | -50.88             |
| SC12   | 10412525   | -5.79                    | -57.66             |
| SC13   | 44541200   | -5.79                    | -45.10             |
| SC14   | 16072884   | -5.77                    | -47.02             |
| SC15   | 68859235   | -5.74                    | -40.43             |
| SC16   | 10434945   | -5.71                    | -43.93             |
| SC17   | 11994260   | -5.66                    | -32.52             |
| SC18   | 11305298   | -5.66                    | -46.99             |
| SC19   | 153160     | -5.65                    | -54.15             |
| SC20   | 59835315   | -5.59                    | -51.32             |

|             |                 |       |               |
|-------------|-----------------|-------|---------------|
| <b>SC21</b> | <b>59863202</b> | -5.56 | <b>-42.39</b> |
| <b>SC22</b> | <b>25000768</b> | -5.54 | <b>-51.98</b> |
| <b>SC23</b> | <b>11583587</b> | -5.53 | <b>-47.93</b> |
| <b>SC24</b> | <b>70408715</b> | -5.53 | <b>-57.73</b> |
| <b>SC25</b> | <b>68040943</b> | -5.53 | <b>-49.75</b> |
| <b>SC26</b> | <b>59229103</b> | -5.44 | <b>-50.79</b> |
| <b>SC27</b> | <b>13032841</b> | -5.43 | <b>-52.94</b> |
| <b>SC28</b> | <b>59825360</b> | -5.43 | <b>-56.50</b> |
| <b>SC29</b> | <b>44541201</b> | -5.43 | <b>-57.92</b> |
| <b>SC30</b> | <b>44275839</b> | -5.39 | <b>-45.53</b> |
| <b>SC31</b> | <b>433060</b>   | -5.38 | <b>-48.97</b> |
| <b>SC32</b> | <b>126805</b>   | -5.35 | <b>-37.98</b> |

**Supplementary Table 3:** Docking scores of top identified conformers similar to Mitoxantrone from PubChem database with docking score more than -5.3 kcal/mol.

| <b>S. No.</b> | <b>PubChem ID</b> | <b>Docking score (kcal/mol)</b> | <b>MM-GBSA (kcal/mol)</b> |
|---------------|-------------------|---------------------------------|---------------------------|
| <b>SF1</b>    | <b>9543511</b>    | -6.104                          | <b>-51.061</b>            |
| <b>SF2</b>    | <b>10412525</b>   | -5.794                          | <b>-57.658</b>            |
| <b>SF3</b>    | <b>44541200</b>   | -5.786                          | <b>-45.099</b>            |
| <b>SF4</b>    | <b>16072884</b>   | -5.769                          | <b>-47.023</b>            |
| <b>SF5</b>    | <b>10434945</b>   | -5.705                          | <b>-43.93</b>             |
| <b>SF6</b>    | <b>11305298</b>   | -5.659                          | <b>-46.986</b>            |
| <b>SF7</b>    | <b>153160</b>     | -5.647                          | <b>-54.154</b>            |
| <b>SF8</b>    | <b>59835315</b>   | -5.589                          | <b>-51.32</b>             |
| <b>SF9</b>    | <b>25000768</b>   | -5.535                          | <b>-51.981</b>            |
| <b>SF10</b>   | <b>11583587</b>   | -5.534                          | <b>-47.927</b>            |
| <b>SF11</b>   | <b>68040943</b>   | -5.527                          | <b>-49.748</b>            |
| <b>SF12</b>   | <b>13032841</b>   | -5.426                          | <b>-52.943</b>            |
| <b>SF13</b>   | <b>44275839</b>   | -5.389                          | <b>-45.53</b>             |
| <b>SF14</b>   | <b>433060</b>     | -5.384                          | <b>-48.973</b>            |
| <b>SF15</b>   | <b>126805</b>     | -5.348                          | <b>-37.976</b>            |

**Supplementary Movie 1:** Simulation trajectory of one microsecond long NSP1-CTR in complex with MTX using OPLS 2005 forcefield in Desmond simulation package.
