# Supplementary material for: Mitoxantrone dihydrochloride, an FDA approved drug, binds with SARS-CoV-2 NSP1 C-terminal
Source: Royal Society of Chemistry journal article supplement (doi:10.1039/d1ra07434b), 2022-01-01
Supplement: d1ra07434b2.pdf [file d1ra07434b2.pdf]

## Mitoxantrone dihydrochloride, an FDA approved drug, binds with SARS-CoV-2 NSP1 C-terminal

Prateek Kumar<sup>1#</sup>, Taniya Bhardwaj<sup>1#</sup>, and Rajanish Giri<sup>1\*</sup>

<sup>1</sup>Indian Institute of Technology Mandi, School of Basic Sciences, VPO Kamand, Himachal Pradesh 175005, India

\*Correspondence: Dr. Rajanish Giri, School of Basic Sciences, Indian Institute of Technology Mandi, Himachal Pradesh 175005, India. Email: [rajanishgiri@iitmandi.ac.in](mailto:rajanishgiri@iitmandi.ac.in). Telephone number: 01905-267134, Fax number: 01905-267138

### Supplementary Information

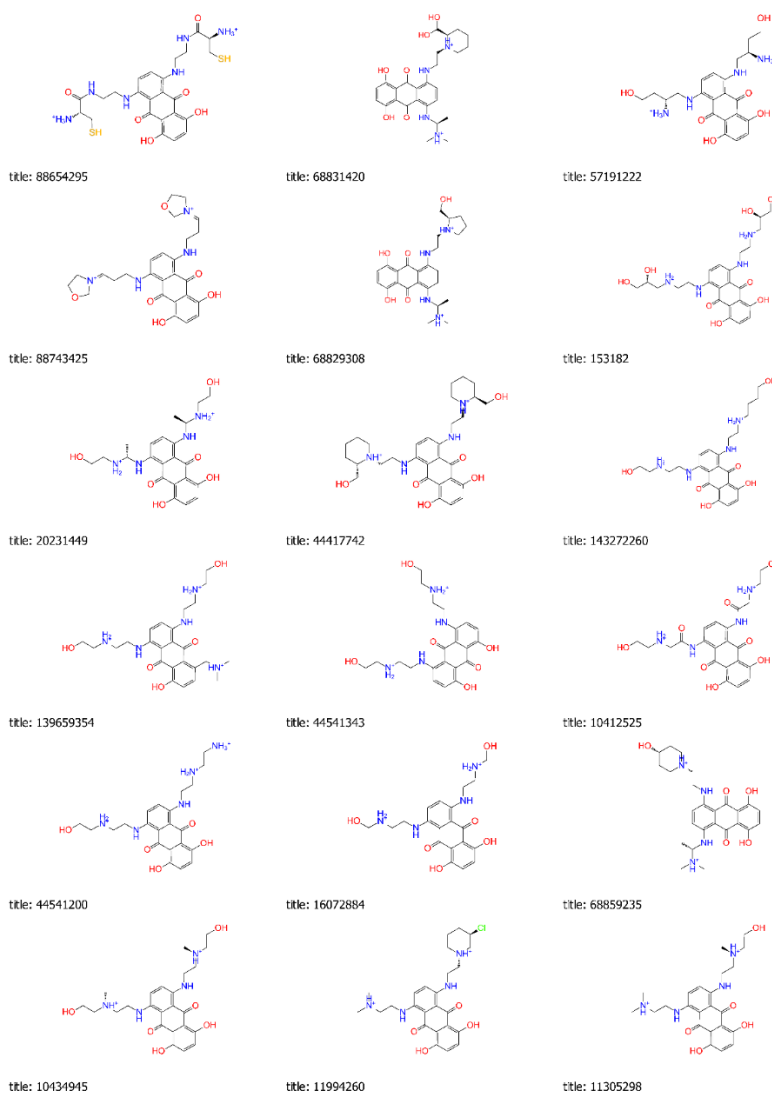

**Supplementary Figure 1A:** Two-dimensional structures of top identified compounds similar to Mitoxantrone from PubChem database with docking score more than -5.3 kcal/mol.

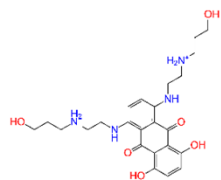

title: 153160

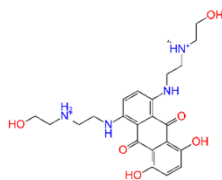

title: 59835315

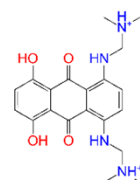

title: 59863202

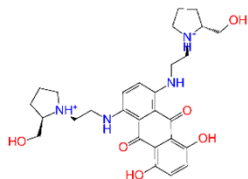

title: 25000768

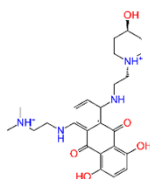

title: 11583587

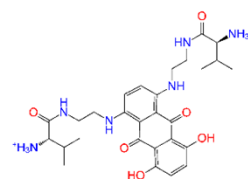

title: 70408715

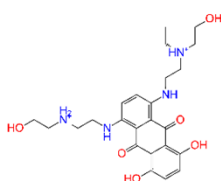

title: 68040943

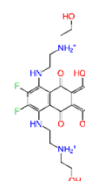

title: 59229103

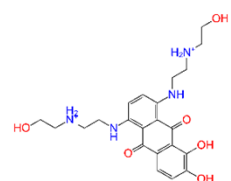

title: 13032841

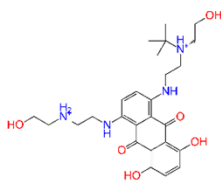

title: 59825360

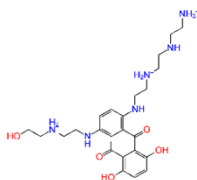

title: 44541201

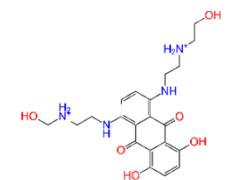

title: 44275839

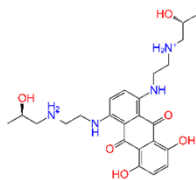

title: 433060

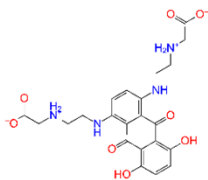

title: 126805

**Supplementary Figure 1B:** Two-dimensional structures of top identified compounds similar to Mitoxantrone from PubChem database with docking score more than -5.3 kcal/mol.

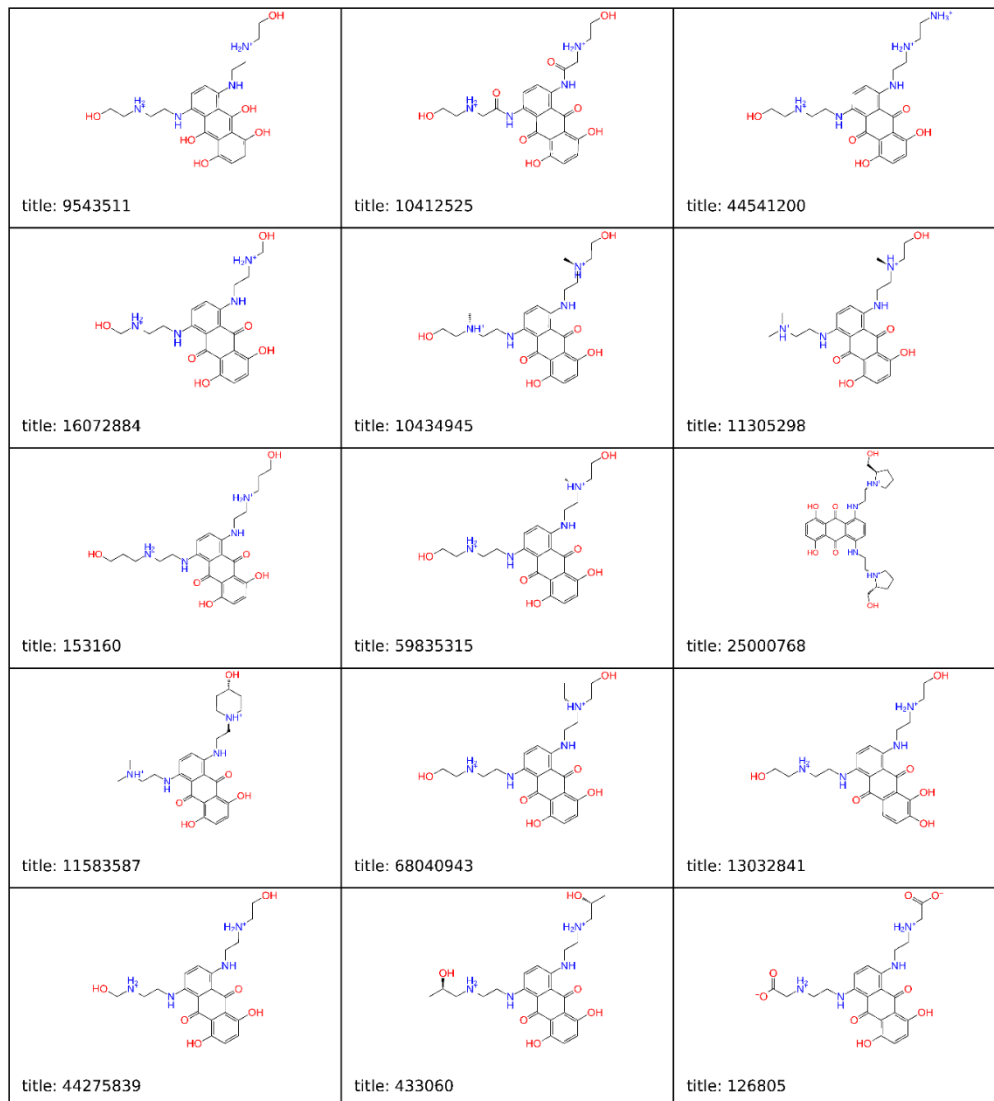

**Supplementary Figure 2:** Two-dimensional structures of top identified conformers similar to Mitoxantrone from PubChem database with docking score more than -5.3 kcal/mol.

### NSP1\_CTR-88654295

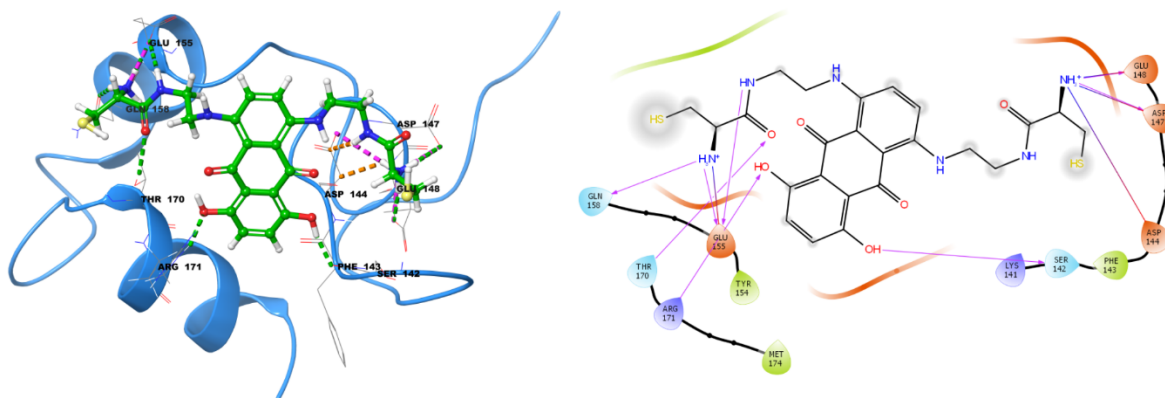

### NSP1\_CTR-68831420

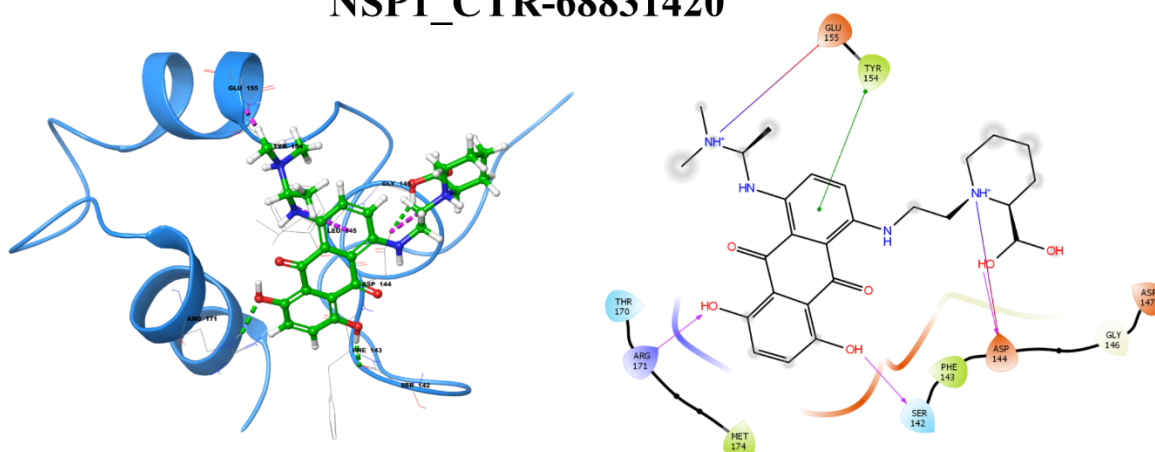

### NSP1\_CTR-57191222

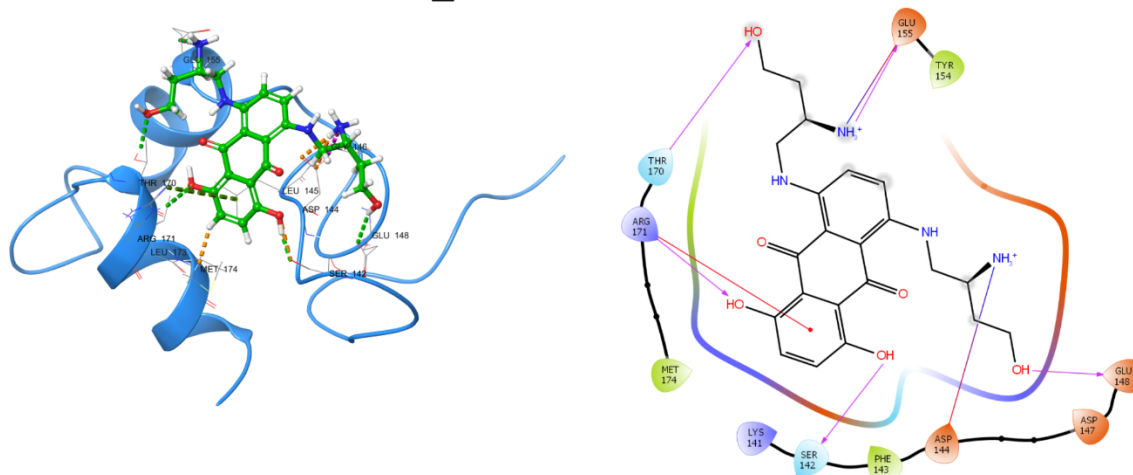

**Supplementary Figure 3A:** Three-dimensional binding poses and two-dimensional interaction diagrams of top identified compounds similar to Mitoxantrone from PubChem database with docking score more than -5.3 kcal/mol.

## NSP1\_CTR-88743425

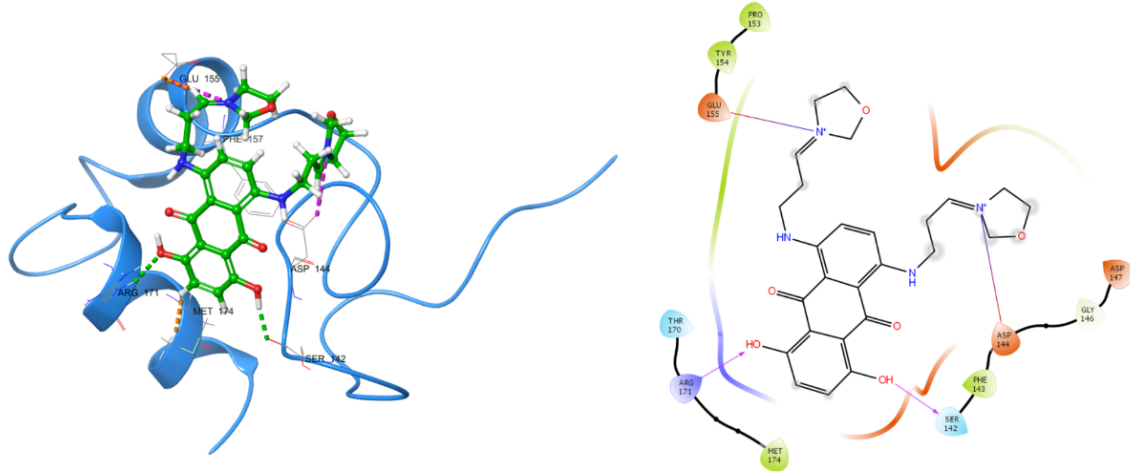

## NSP1\_CTR-68829308

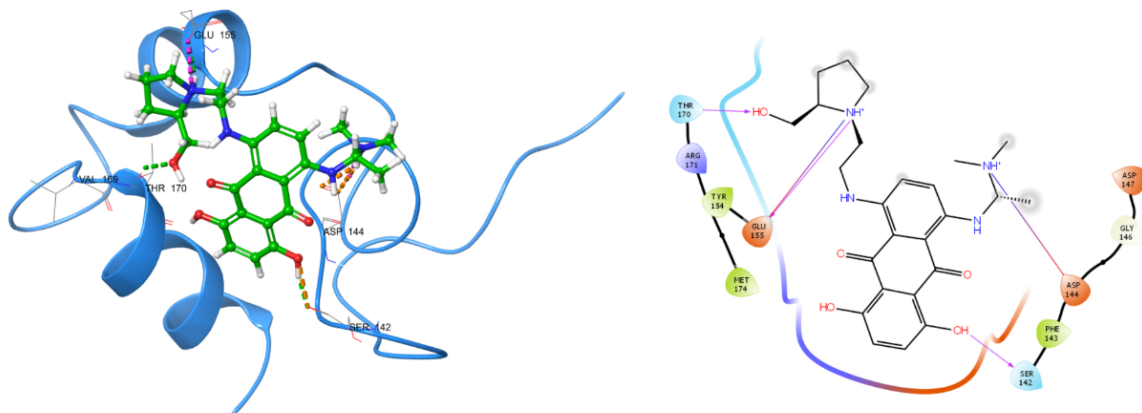

**Supplementary Figure 3B:** Three-dimensional binding poses and two-dimensional interaction diagrams of top identified compounds similar to Mitoxantrone from PubChem database with docking score more than -5.3 kcal/mol.

## NSP1\_CTR-9543511

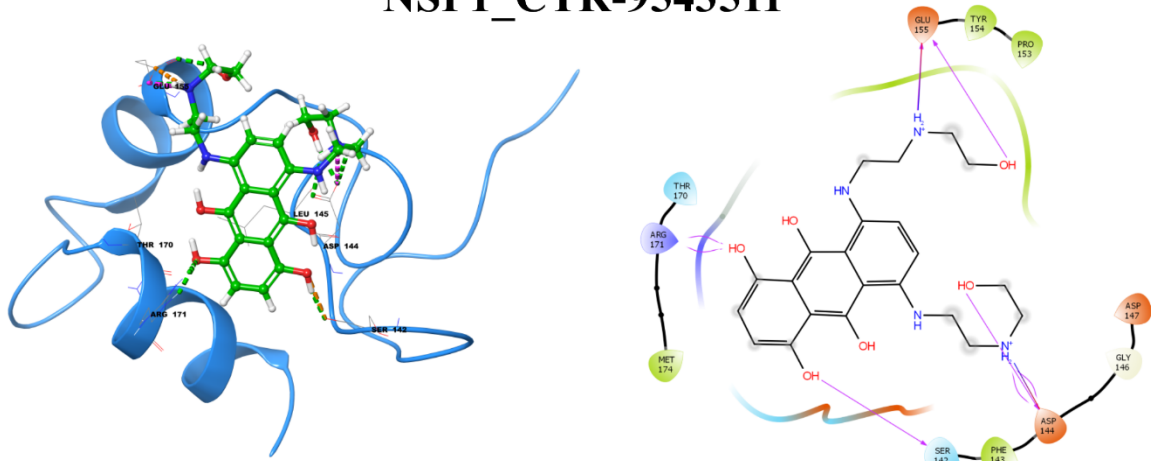

## NSP1\_CTR-10412525

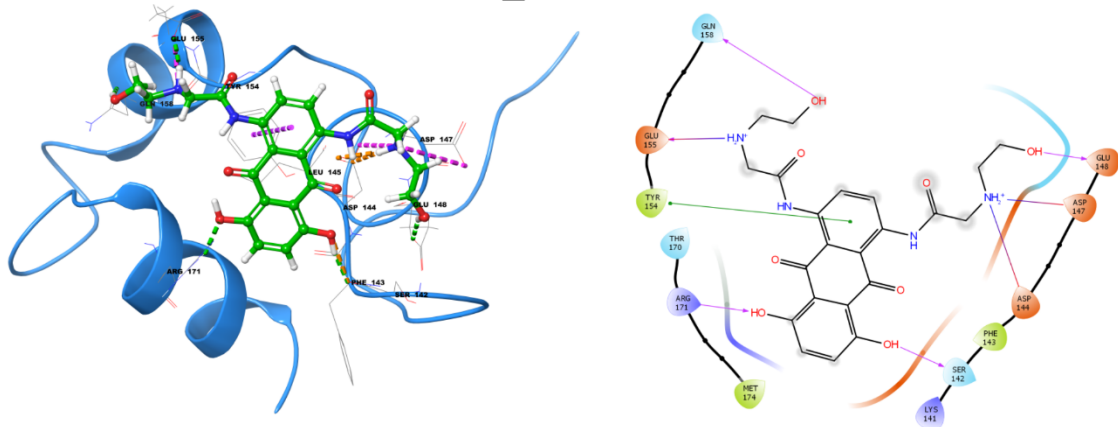

## NSP1\_CTR-44541200

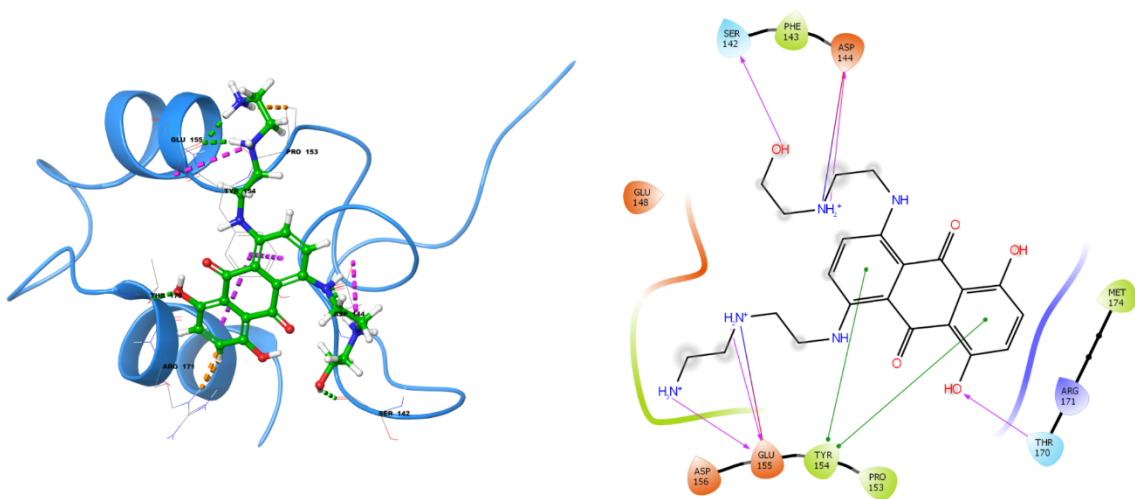

**Supplementary Figure 4A:** Three-dimensional binding poses and two-dimensional interaction diagrams of top identified conformers similar to Mitoxantrone from PubChem database with docking score more than -5.3 kcal/mol.

## NSP1\_CTR-16072884

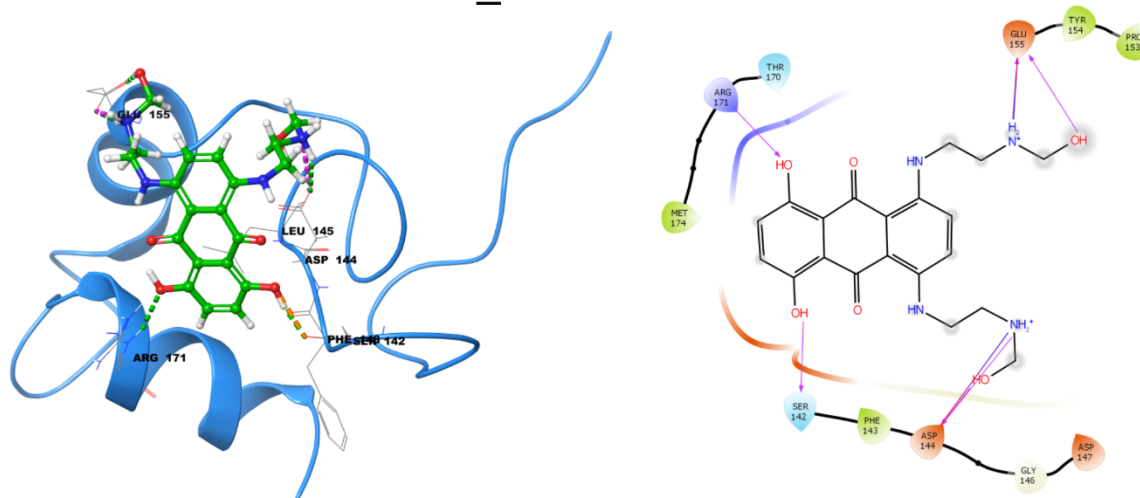

## NSP1\_CTR-10434945

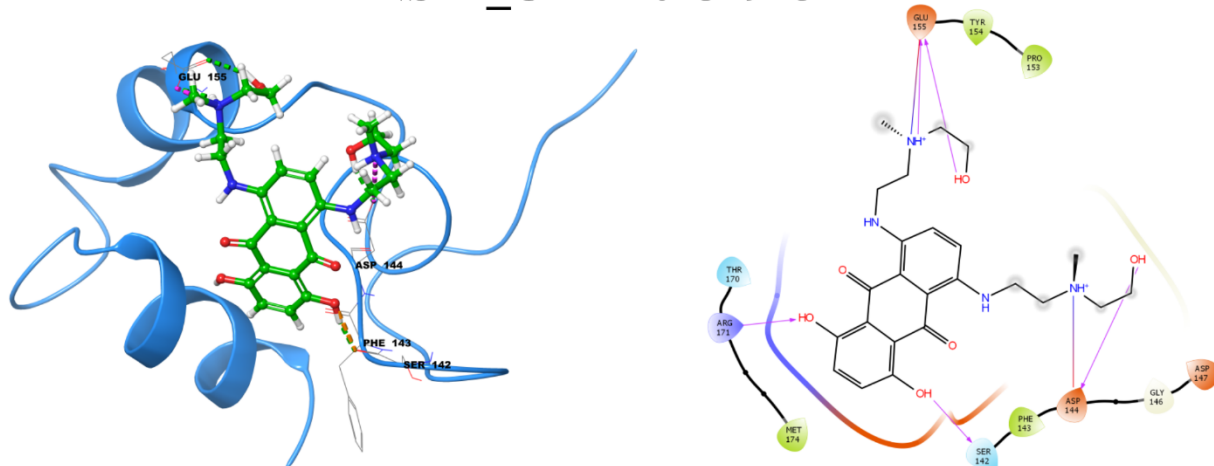

**Supplementary Figure 4B:** Three-dimensional binding poses and two-dimensional interaction diagrams of top identified conformers similar to Mitoxantrone from PubChem database with docking score more than -5.3 kcal/mol.

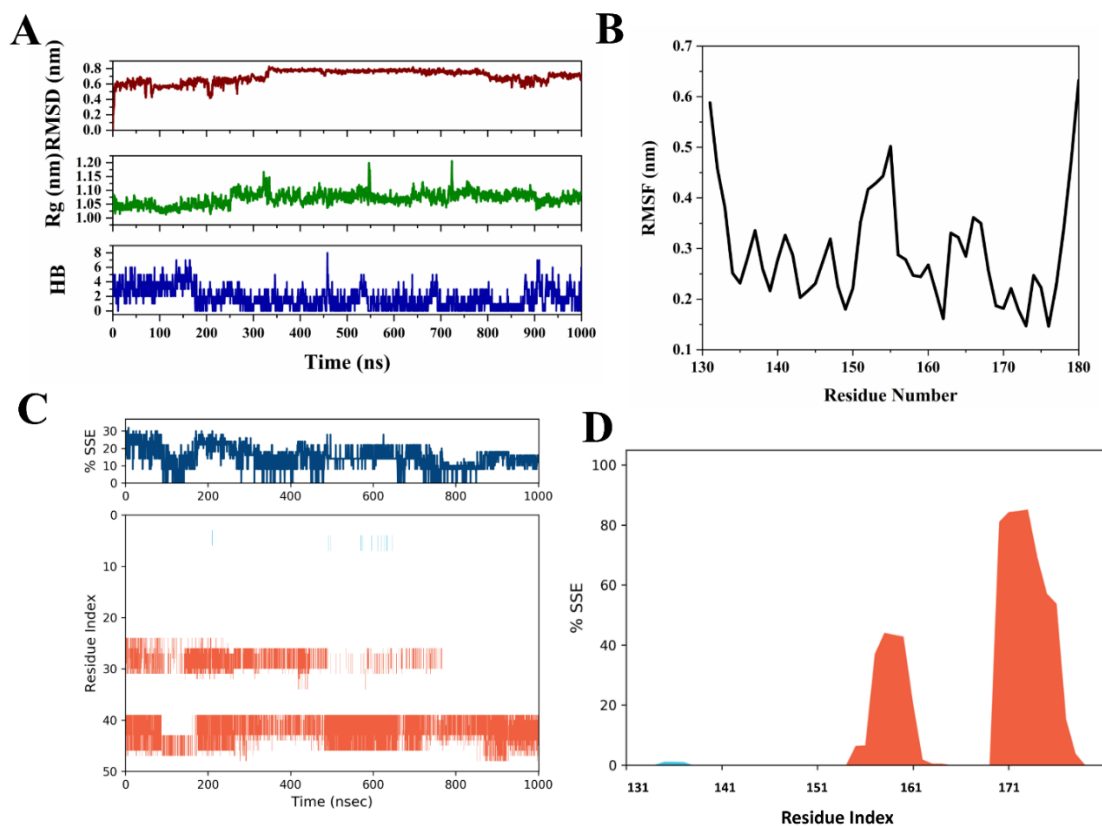

**Supplementary Figure 5:** Molecular dynamics simulation analysis of MTX bound NSP1-CTR using OPLS 2005 forcefield: (A) RMSD, Rg, of C-alpha ( $C\alpha$ ) atoms and hydrogen bonds (from up to down), (B) RMSF analysis of C-alpha atoms, (C) Timeline representation of each residue of forming helical and beta sheets in respective frame of one microsecond long simulation trajectory. (D) Total secondary structure element (%SSE) is shown for each residue during entire simulation period. The orange color shows helical region and cyan shows the beta sheets.





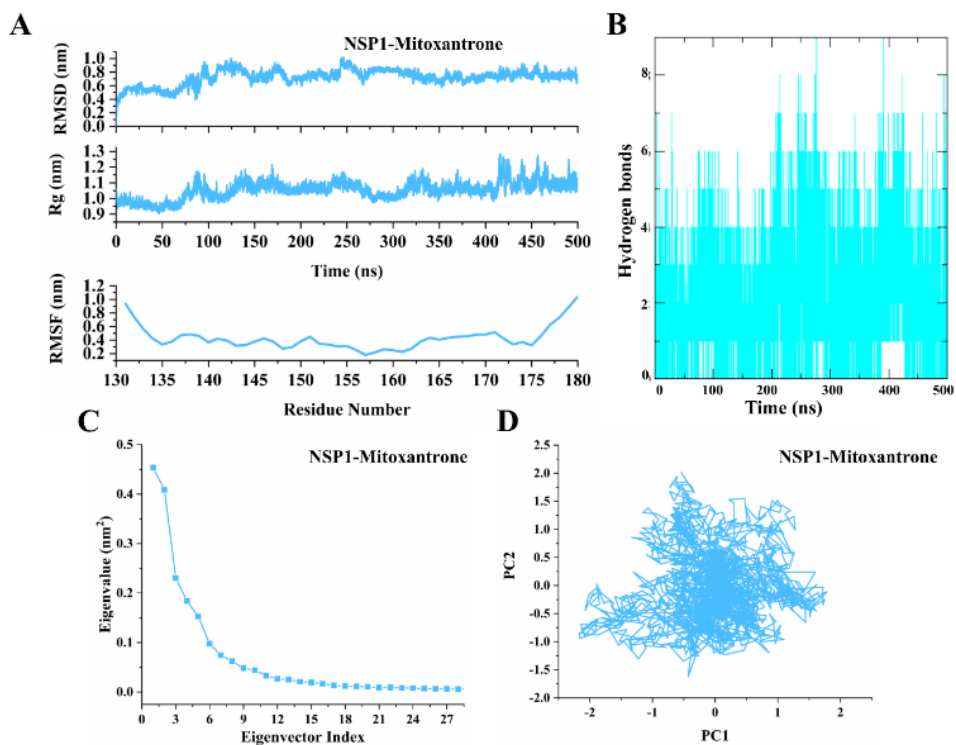

**Supplementary Figure 7:** Molecular dynamics simulation analysis of MTX bound NSP1-CTR using GROMOS 54A7 forcefield: (A) RMSD, Rg, and RMSF (from up to down), (B) hydrogen bonds analysis, (C) Eigenvector vs Eigenvalue plot, and (D) principal component analysis of last 20 ns simulation trajectory.

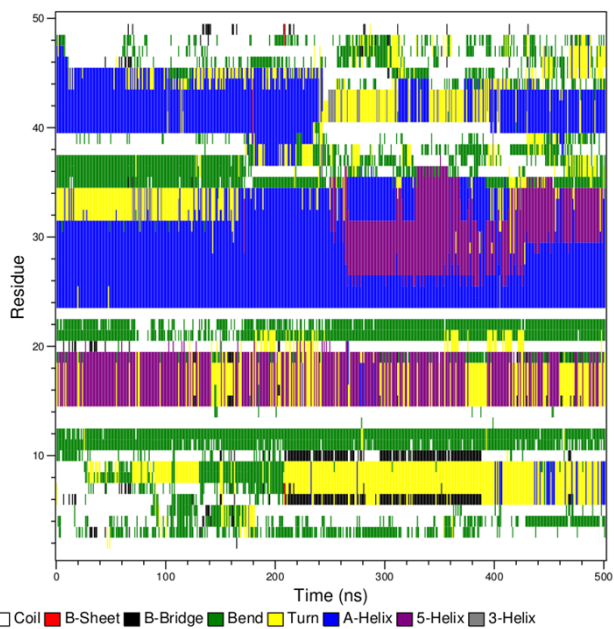

**Supplementary Figure 8:** Timeline representation of secondary structure change in NSP1-CTR during 500 ns long simulation trajectory. The colors are illustrated within the figure.

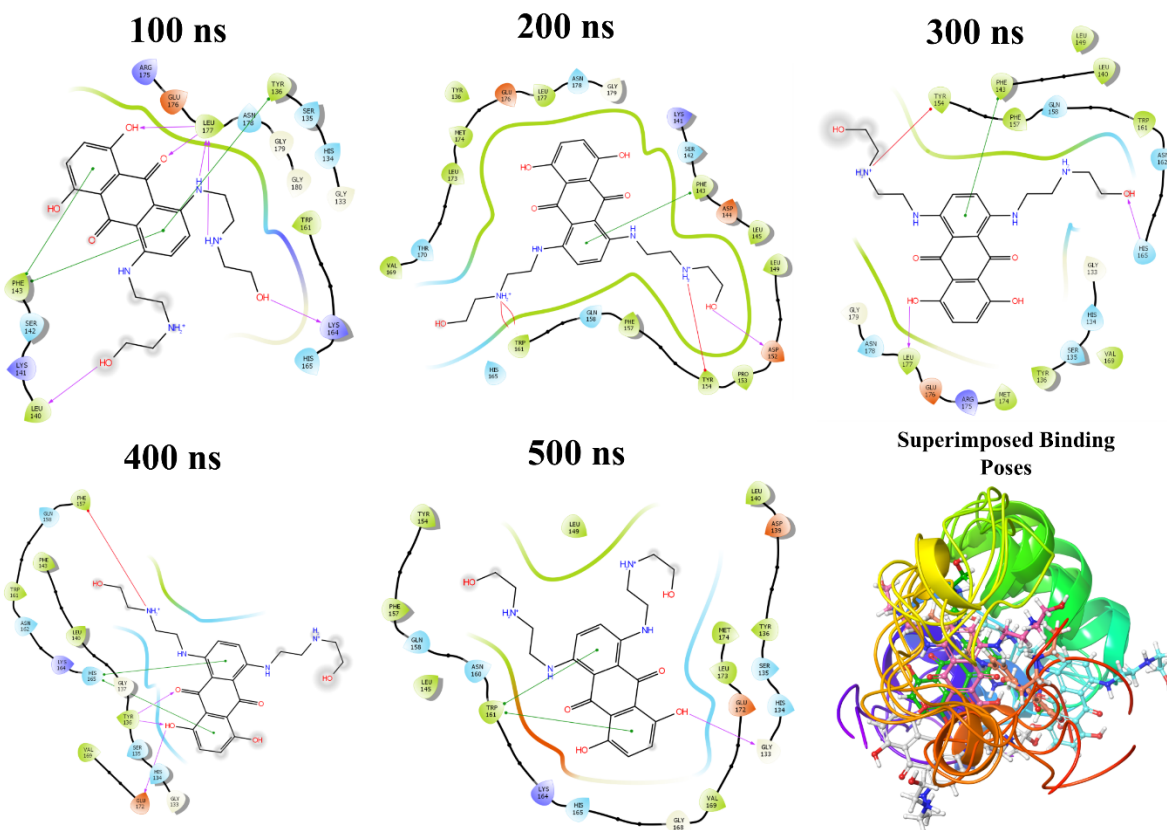

**Supplementary Figure 9: Snapshots of NSP1-CTR and MTX complex from Gromacs simulation trajectory:** Two-dimensional interaction diagrams are shown for captured frames at a regular interval of 100 ns. The corresponding three-dimensional poses are superimposed.

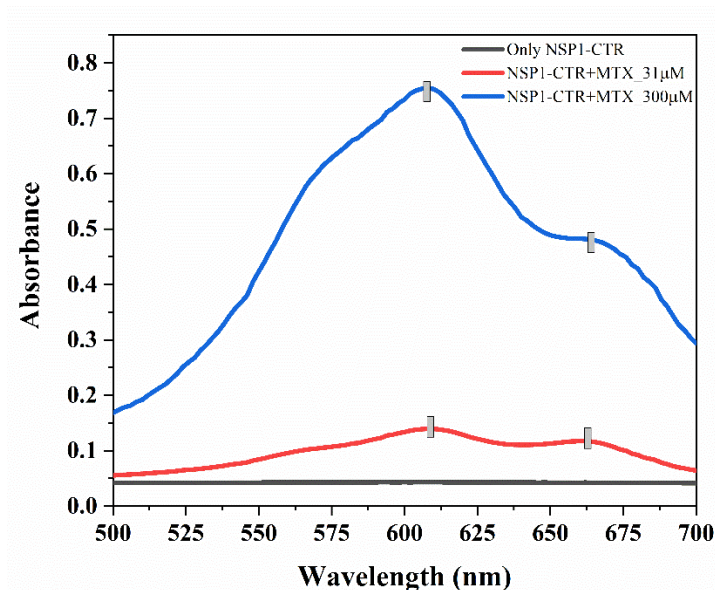

**Supplementary Figure 10:** Absorption spectra of NSP1-CTR in absence and presence of MTX at two concentrations (31  $\mu\text{M}$  and 300  $\mu\text{M}$ ) representing two major peaks around 660 nm and 610 nm corresponding to monomer and dimer forms, respectively.

**Supplementary Table 1:** Detailed list of changes in  $\tau_1$ ,  $\tau_2$ , and  $\tau_3$  components of tryptophan lifetime of NSP1 due to increasing concentration of mitoxantrone.

| Mitoxantrone Concentration ( $\mu\text{M}$ )    | $\tau_1 \pm s$ (ns) | $\tau_2 \pm s$ (ns) | $\tau_3 \pm s$ (ns) |
|-------------------------------------------------|---------------------|---------------------|---------------------|
| <b>0</b><br>(Only NSP1-CTR; 7.5 $\mu\text{M}$ ) | 2.42 $\pm$ 0.10     | 0.61 $\pm$ 0.02     | 5.28 $\pm$ 0.04     |
| <b>25</b>                                       | 2.31 $\pm$ 0.06     | 5.12 $\pm$ 0.06     | 0.63 $\pm$ 0.02     |
| <b>50</b>                                       | 2.23 $\pm$ 0.08     | 5.02 $\pm$ 0.05     | 0.59 $\pm$ 0.02     |
| <b>100</b>                                      | 2.26 $\pm$ 0.08     | 4.96 $\pm$ 0.06     | 0.62 $\pm$ 0.02     |
| <b>200</b>                                      | 2.24 $\pm$ 0.08     | 4.91 $\pm$ 0.06     | 0.58 $\pm$ 0.01     |

**Supplementary Table 2:** Docking scores of top identified compounds similar to Mitoxantrone from PubChem database with docking score more than -5.3 kcal/mol.

| S. No. | PubChem ID | Docking score (kcal/mol) | MM-GBSA (kcal/mol) |
|--------|------------|--------------------------|--------------------|
| SC1    | 88654295   | -6.93                    | -49.28             |
| SC2    | 68831420   | -6.66                    | -43.76             |
| SC3    | 57191222   | -6.34                    | -53.37             |
| SC4    | 88743425   | -6.17                    | -42.06             |
| SC5    | 68829308   | -6.10                    | -48.03             |
| SC6    | 153182     | -6.08                    | -54.47             |
| SC7    | 20231449   | -6.06                    | -43.61             |
| SC8    | 44417742   | -6.03                    | -48.63             |
| SC9    | 143272260  | -6.01                    | -52.19             |
| SC10   | 139659354  | -5.98                    | -56.79             |
| SC11   | 44541343   | -5.86                    | -50.88             |
| SC12   | 10412525   | -5.79                    | -57.66             |
| SC13   | 44541200   | -5.79                    | -45.10             |
| SC14   | 16072884   | -5.77                    | -47.02             |
| SC15   | 68859235   | -5.74                    | -40.43             |
| SC16   | 10434945   | -5.71                    | -43.93             |
| SC17   | 11994260   | -5.66                    | -32.52             |
| SC18   | 11305298   | -5.66                    | -46.99             |
| SC19   | 153160     | -5.65                    | -54.15             |
| SC20   | 59835315   | -5.59                    | -51.32             |

|             |                 |       |        |
|-------------|-----------------|-------|--------|
| <b>SC21</b> | <b>59863202</b> | -5.56 | -42.39 |
| <b>SC22</b> | <b>25000768</b> | -5.54 | -51.98 |
| <b>SC23</b> | <b>11583587</b> | -5.53 | -47.93 |
| <b>SC24</b> | <b>70408715</b> | -5.53 | -57.73 |
| <b>SC25</b> | <b>68040943</b> | -5.53 | -49.75 |
| <b>SC26</b> | <b>59229103</b> | -5.44 | -50.79 |
| <b>SC27</b> | <b>13032841</b> | -5.43 | -52.94 |
| <b>SC28</b> | <b>59825360</b> | -5.43 | -56.50 |
| <b>SC29</b> | <b>44541201</b> | -5.43 | -57.92 |
| <b>SC30</b> | <b>44275839</b> | -5.39 | -45.53 |
| <b>SC31</b> | <b>433060</b>   | -5.38 | -48.97 |
| <b>SC32</b> | <b>126805</b>   | -5.35 | -37.98 |

**Supplementary Table 3:** Docking scores of top identified conformers similar to Mitoxantrone from PubChem database with docking score more than -5.3 kcal/mol.

| <b>S. No.</b> | <b>PubChem ID</b> | <b>Docking score (kcal/mol)</b> | <b>MM-GBSA (kcal/mol)</b> |
|---------------|-------------------|---------------------------------|---------------------------|
| <b>SF1</b>    | <b>9543511</b>    | -6.104                          | -51.061                   |
| <b>SF2</b>    | <b>10412525</b>   | -5.794                          | -57.658                   |
| <b>SF3</b>    | <b>44541200</b>   | -5.786                          | -45.099                   |
| <b>SF4</b>    | <b>16072884</b>   | -5.769                          | -47.023                   |
| <b>SF5</b>    | <b>10434945</b>   | -5.705                          | -43.93                    |
| <b>SF6</b>    | <b>11305298</b>   | -5.659                          | -46.986                   |
| <b>SF7</b>    | <b>153160</b>     | -5.647                          | -54.154                   |
| <b>SF8</b>    | <b>59835315</b>   | -5.589                          | -51.32                    |
| <b>SF9</b>    | <b>25000768</b>   | -5.535                          | -51.981                   |
| <b>SF10</b>   | <b>11583587</b>   | -5.534                          | -47.927                   |
| <b>SF11</b>   | <b>68040943</b>   | -5.527                          | -49.748                   |
| <b>SF12</b>   | <b>13032841</b>   | -5.426                          | -52.943                   |
| <b>SF13</b>   | <b>44275839</b>   | -5.389                          | -45.53                    |
| <b>SF14</b>   | <b>433060</b>     | -5.384                          | -48.973                   |
| <b>SF15</b>   | <b>126805</b>     | -5.348                          | -37.976                   |

**Supplementary Movie 1:** Simulation trajectory of one microsecond long NSP1-CTR in complex with MTX using OPLS 2005 forcefield in Desmond simulation package.
